# Supplementary material
Source: publisher figshare collection journal article supplement (https://diabetesjournals.figshare.com/articles/dataset/_/12129981)

# Supplemental Fig. 1

**A.**

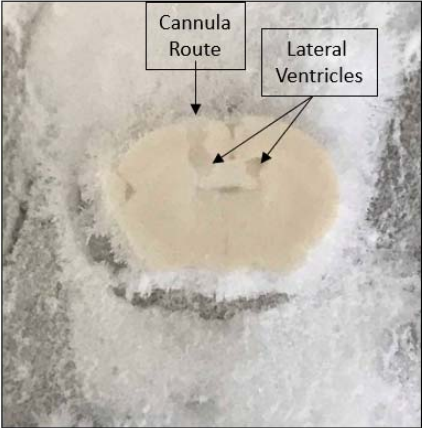

**B.**

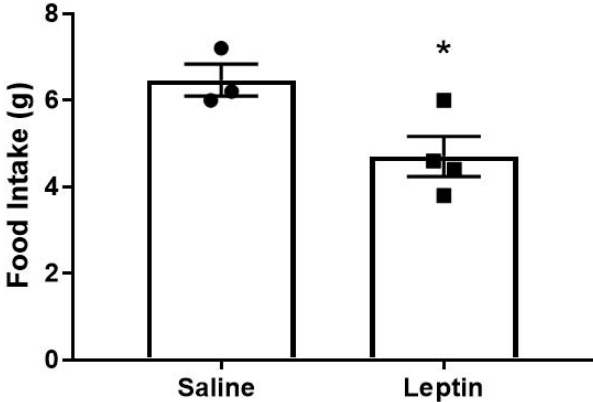

## Supplemental Fig. 2

A.

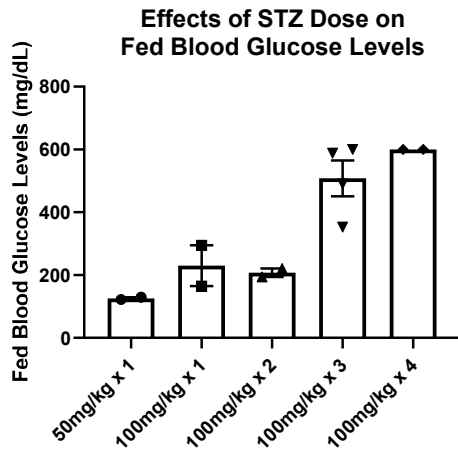

B.

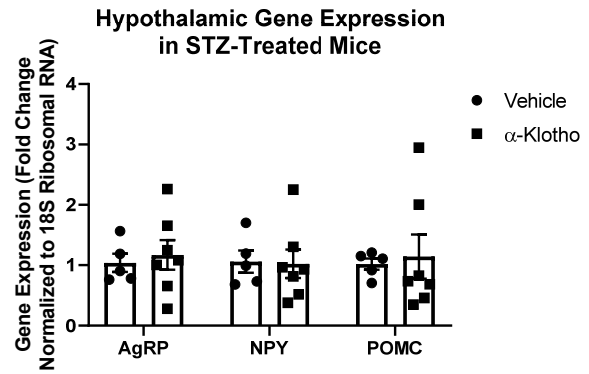

# Supplemental Fig. 3

**A.**

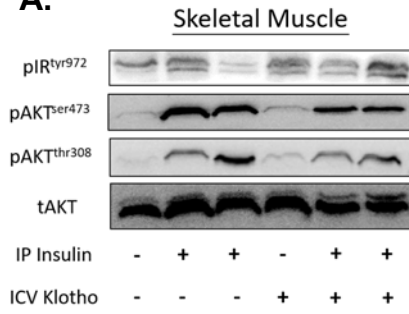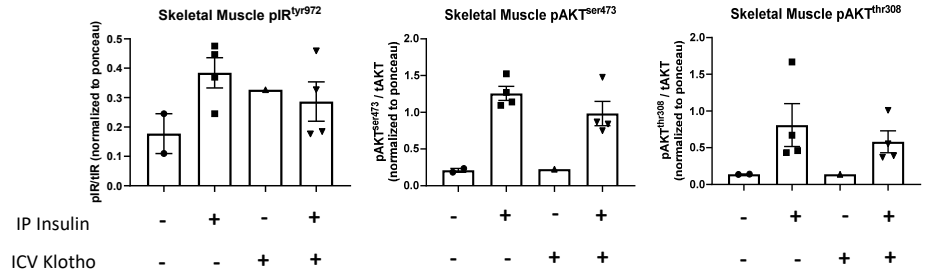

**B.**

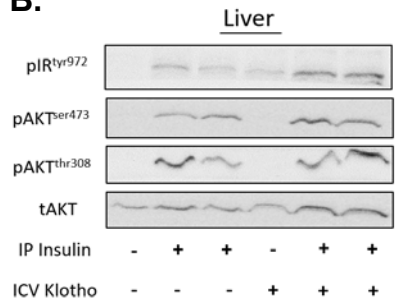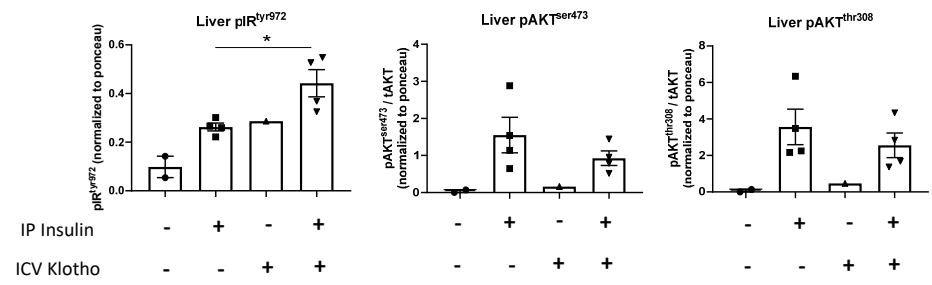

**C.**

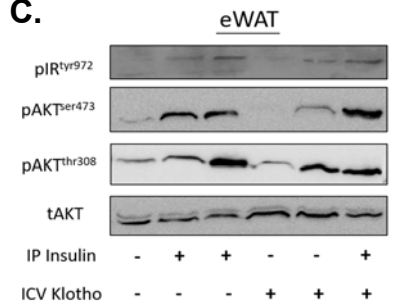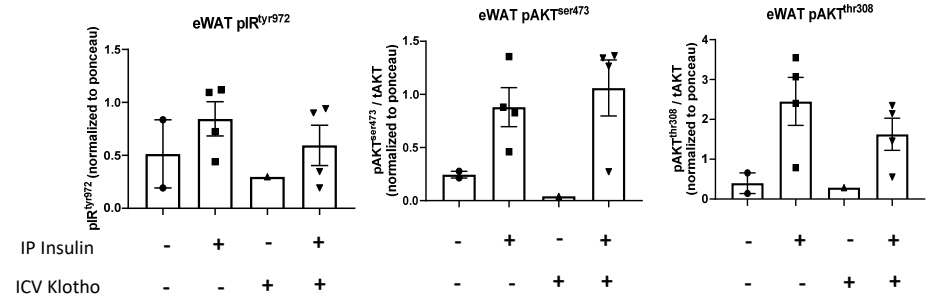

**D.**

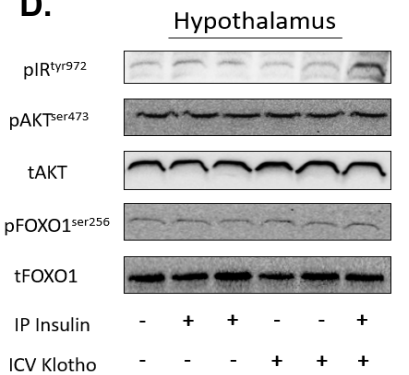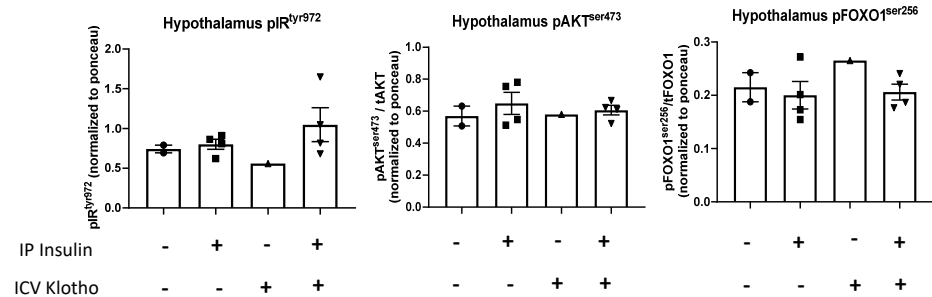

**E.**

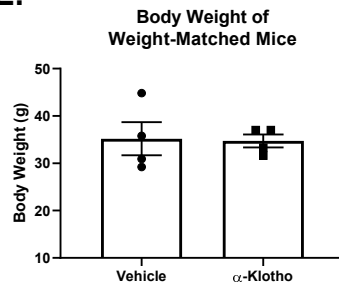

# Supplemental Fig. 4

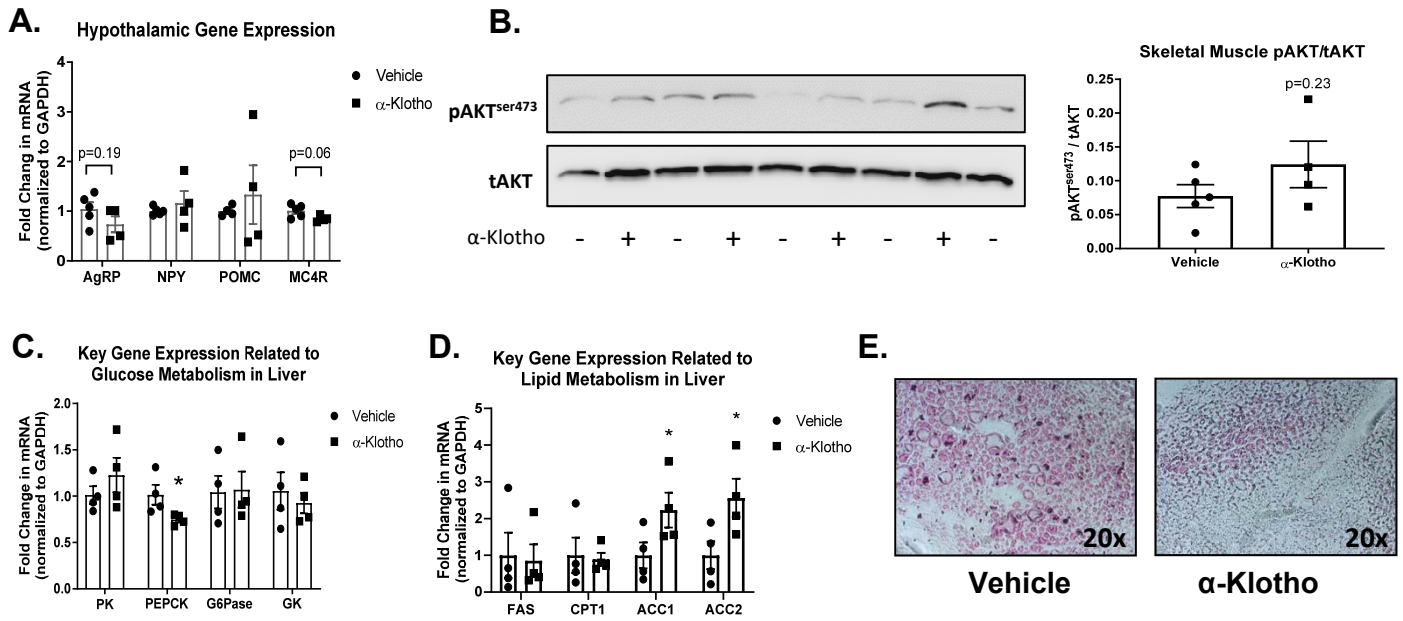

# Supplemental Fig. 5

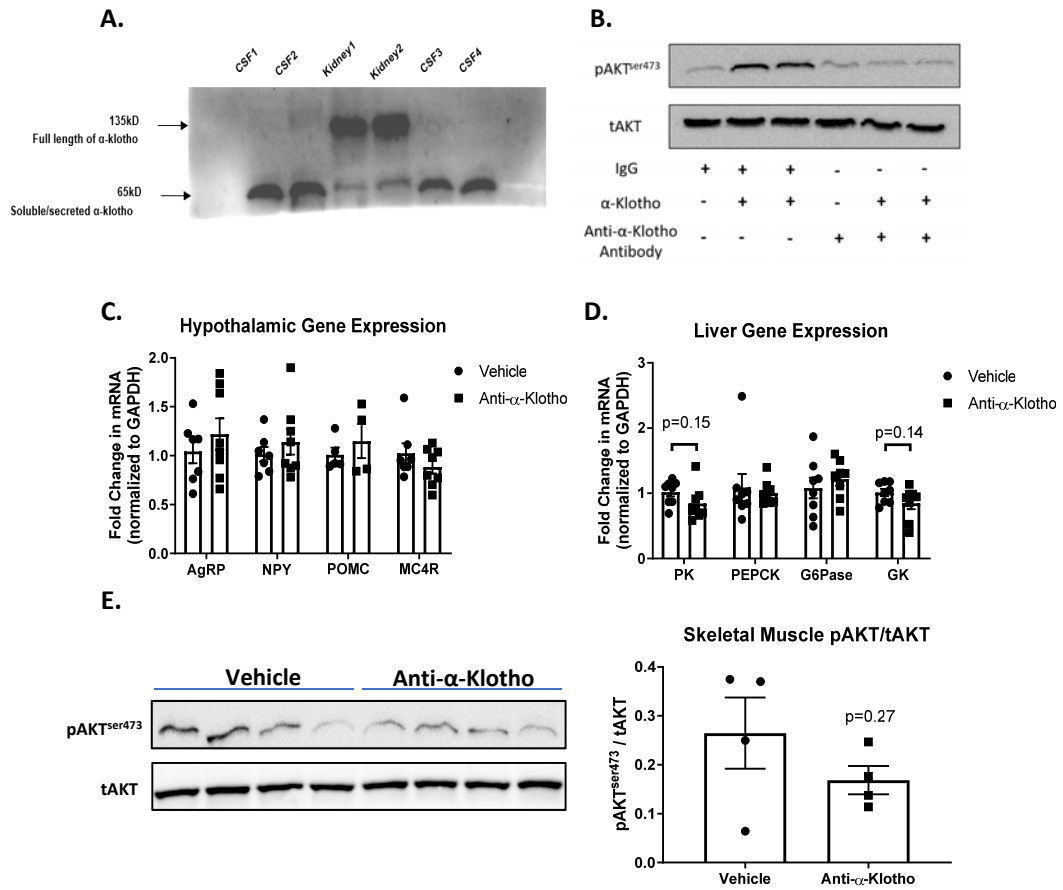

# Supplemental Fig. 6

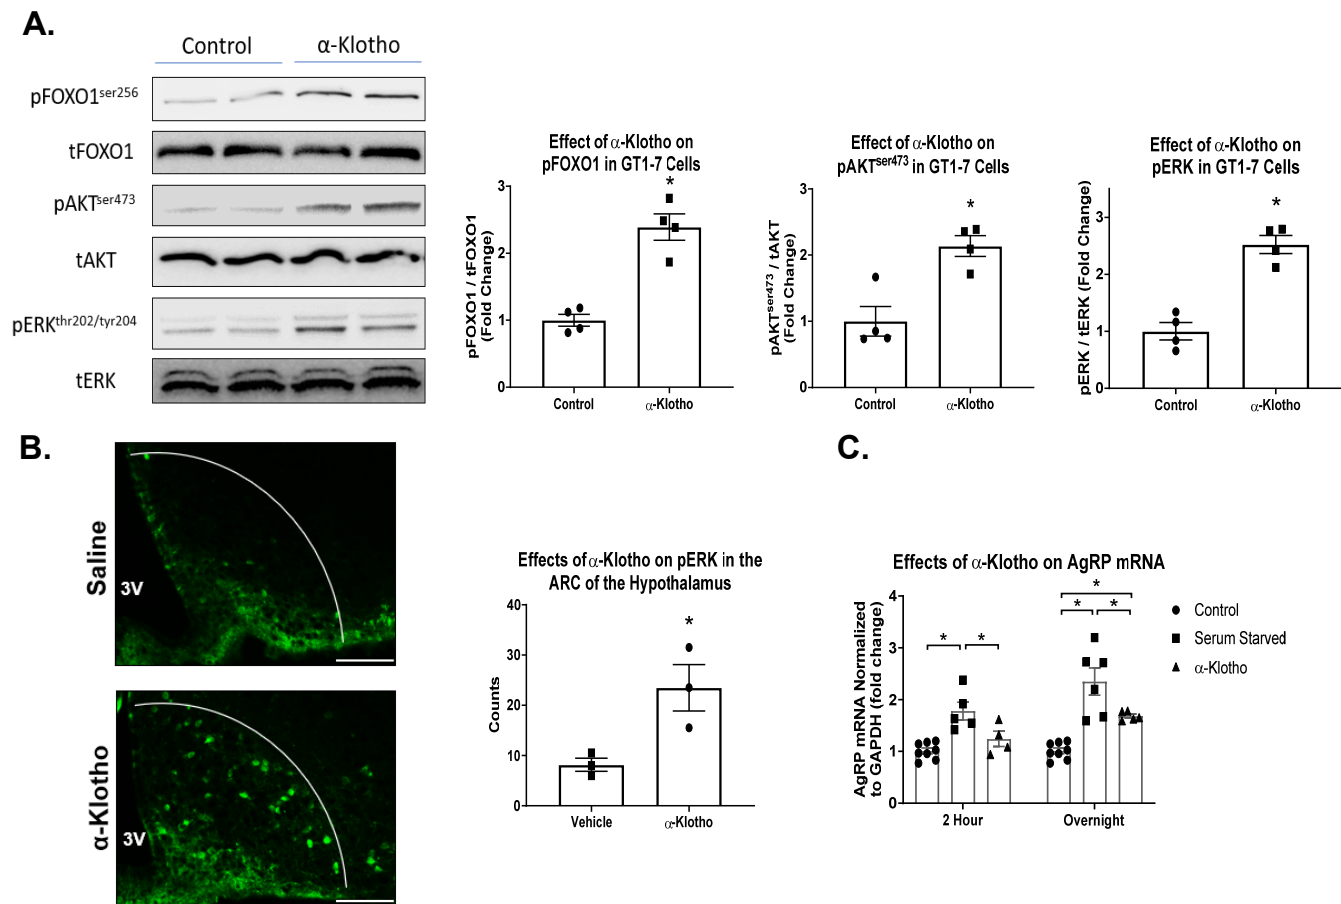

# Supplemental Fig. 7

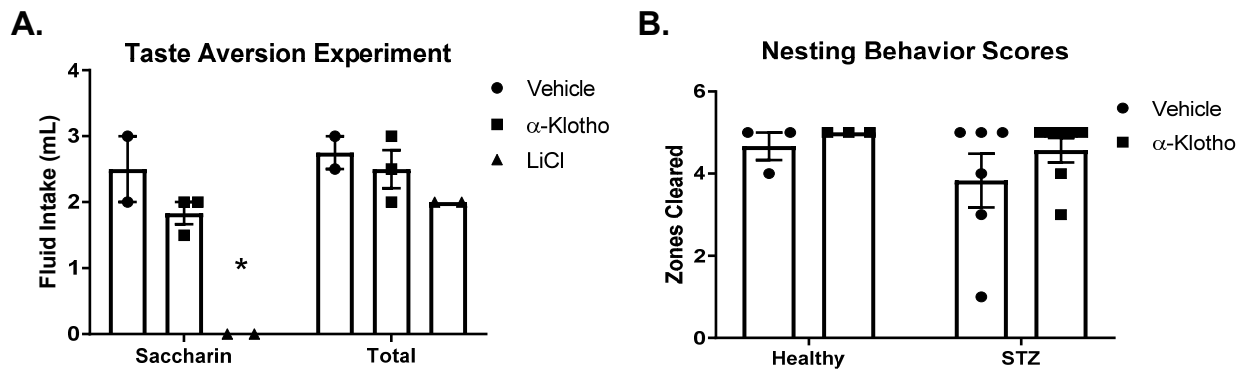

# Supplemental Fig. 8

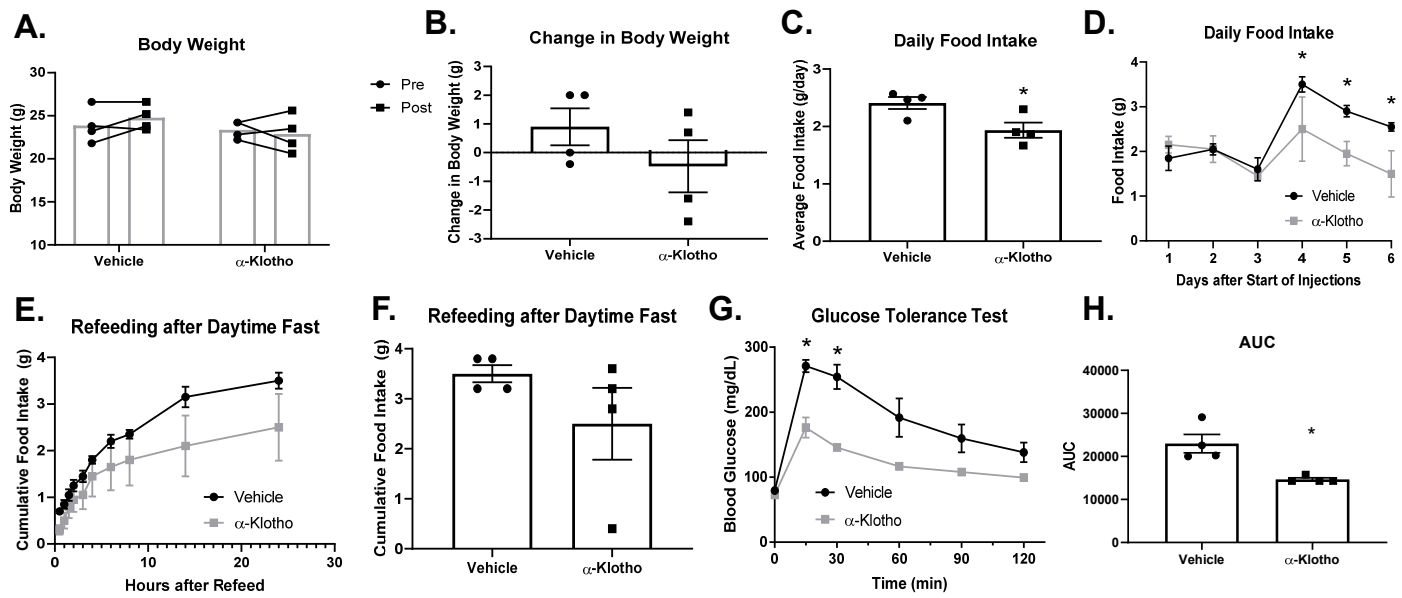



# Supplemental Fig. 9

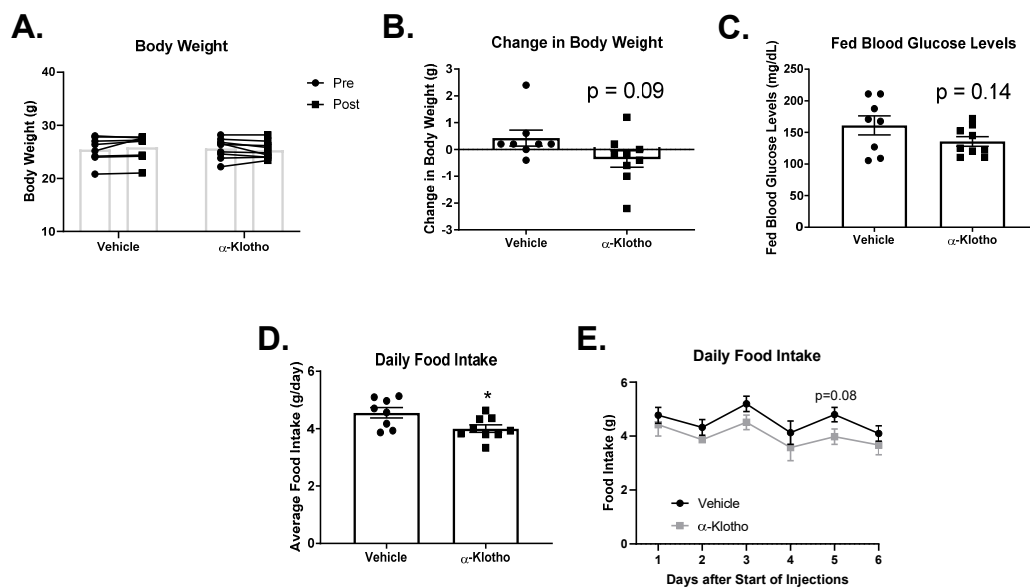

Supplement: Supplementary file 1 [file 1]
